# Supplementary material
Source: publisher figshare collection journal article supplement (https://acs.figshare.com/ndownloader/files/3595431)
Supplement: Supplementary file 1 [file 3595431]

## Supporting Information

### The absolute heating value loss in upgraded coal obtained under different conditions

The absolute heating value loss ( $\Delta$ LHV) can be calculated according to equation (S1). The results are shown in Figure S1.  $\Delta$ LHV gradually increased with increasing temperature.  $\Delta$ LHV in nitrogen and organic atmosphere were very close when temperature was 200 and 300°C, the gap slightly increased when temperature reached 400°C.  $\Delta$ LHV in organic atmosphere were the smallest,  $\Delta$ LHV at 400°C was less than 10%.

$$\Delta\text{LHV} = \frac{\text{LHV}_{\text{ad}} - \text{LHV}_{\text{char}} \times \text{Char yield}}{\text{LHV}_{\text{ad}}} \times 100\% \quad (\text{S1})$$

where,  $\text{LHV}_{\text{ad}}$ : LHV of SL air-dried coal;  $\text{LHV}_{\text{char}}$ : LHV of upgraded coal.

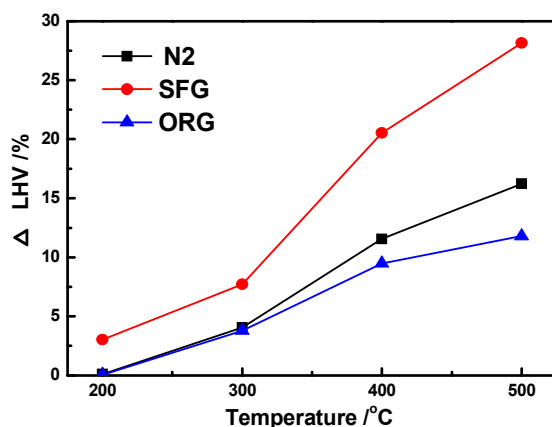

Figure S1. Effect of temperature and atmosphere on  $\Delta$ LHV of upgraded coals
